# Supplementary material
Source: Elsevier journal article supplement (https://comptes-rendus.academie-sciences.fr/chimie/article/10.1016/j.crci.2012.04.003/file/attach/mmc1.pdf)

# checkCIF/PLATON report

No syntax errors found. CIF dictionary Interpreting this report

## Datablock: jml35b

---

Bond precision: C-C = 0.0059 A Wavelength=0.71073

Cell: a=13.370(2) b=14.8788(15) c=15.747(2)  
alpha=111.536(10) beta=106.607(17) gamma=102.280(11)

Temperature: 200 K

|                | Calculated           | Reported             |
|----------------|----------------------|----------------------|
| Volume         | 2609.1(8)            | 2609.0(8)            |
| Space group    | P -1                 | P -1                 |
| Hall group     | -P 1                 | -P 1                 |
| Moiety formula | C92 H126 Mn6 N12 O22 | C92 H126 Mn6 N12 O22 |
| Sum formula    | C92 H126 Mn6 N12 O22 | C92 H126 Mn6 N12 O22 |
| Mr             | 2081.69              | 2081.69              |
| Dx,g cm-3      | 1.325                | 1.325                |
| Z              | 1                    | 1                    |
| Mu (mm-1)      | 0.774                | 0.774                |
| F000           | 1088.0               | 1088.0               |
| F000'          | 1090.44              |                      |
| h,k,lmax       | 18,20,22             | 18,20,22             |
| Nref           | 15201                | 15034                |
| Tmin,Tmax      | 0.830,0.940          | 0.706,0.940          |
| Tmin'          | 0.734                |                      |

Correction method= MULTI-SCAN

Data completeness= 0.989 Theta(max)= 30.000

R(reflections)= 0.0480( 7805) wR2(reflections)= 0.1484( 15034)

S = 1.000

Npar= 632

---

The following ALERTS were generated. Each ALERT has the format

**test-name\_ALERT\_alert-type\_alert-level.**

Click on the hyperlinks for more details of the test.

---

### Alert level B

|                   |                   |   |                                  |      |       |
|-------------------|-------------------|---|----------------------------------|------|-------|
| PLAT220_ALERT_2_B | Large Non-Solvent | C | Ueq(max)/Ueq(min) ...            | 4.17 | Ratio |
| PLAT241_ALERT_2_B | Check High        |   | Ueq as Compared to Neighbors for |      | C22   |
| PLAT242_ALERT_2_B | Check Low         |   | Ueq as Compared to Neighbors for |      | C21A  |
| PLAT242_ALERT_2_B | Check Low         |   | Ueq as Compared to Neighbors for |      | C21B  |

---

### ● Alert level C

|                   |                                                  |            |
|-------------------|--------------------------------------------------|------------|
| PLAT094_ALERT_2_C | Ratio of Maximum / Minimum Residual Density .... | 3.45       |
| PLAT222_ALERT_3_C | Large Non-Solvent H Ueq(max)/Ueq(min) ...        | 3.61 Ratio |
| PLAT241_ALERT_2_C | Check High Ueq as Compared to Neighbors for      | C37        |
| PLAT242_ALERT_2_C | Check Low Ueq as Compared to Neighbors for       | C19A       |
| PLAT242_ALERT_2_C | Check Low Ueq as Compared to Neighbors for       | C41        |
| PLAT242_ALERT_2_C | Check Low Ueq as Compared to Neighbors for       | C44        |
| PLAT242_ALERT_2_C | Check Low Ueq as Compared to Neighbors for       | C19B       |

---

### ● Alert level G

|                   |                                                  |            |
|-------------------|--------------------------------------------------|------------|
| PLAT301_ALERT_3_G | Note: Main Residue Disorder .....                | 4.00 Perc. |
| PLAT333_ALERT_2_G | Check Large Av C6-Ring C-C Dist. C23 -C28        | 1.41 Ang.  |
| PLAT063_ALERT_4_G | Crystal Size Likely too Large for Beam Size .... | 0.40 mm    |
| PLAT779_ALERT_4_G | Suspect or Irrelevant (Bond) Angle in CIF .....  | 28.10 Deg. |
|                   | H22C -C22 -H22F 1.555 1.555 1.555                |            |

---

0 **ALERT level A** = In general: serious problem  
4 **ALERT level B** = Potentially serious problem  
7 **ALERT level C** = Check and explain  
4 **ALERT level G** = General alerts; check

0 ALERT type 1 CIF construction/syntax error, inconsistent or missing data  
11 ALERT type 2 Indicator that the structure model may be wrong or deficient  
2 ALERT type 3 Indicator that the structure quality may be low  
2 ALERT type 4 Improvement, methodology, query or suggestion  
0 ALERT type 5 Informative message, check

---

### Publication of your CIF in IUCr journals

**A basic structural check has been run on your CIF. These basic checks will be run on all CIFs submitted for publication in IUCr journals (*Acta Crystallographica*, *Journal of Applied Crystallography*, *Journal of Synchrotron Radiation*); however, if you intend to submit to *Acta Crystallographica Section C* or *E*, you should make sure that full publication checks are run on the final version of your CIF prior to submission.**

### Publication of your CIF in other journals

**Please refer to the *Notes for Authors* of the relevant journal for any special instructions relating to CIF submission.**

---

**PLATON version of 06/08/2009; check.def file version of 04/08/2009**

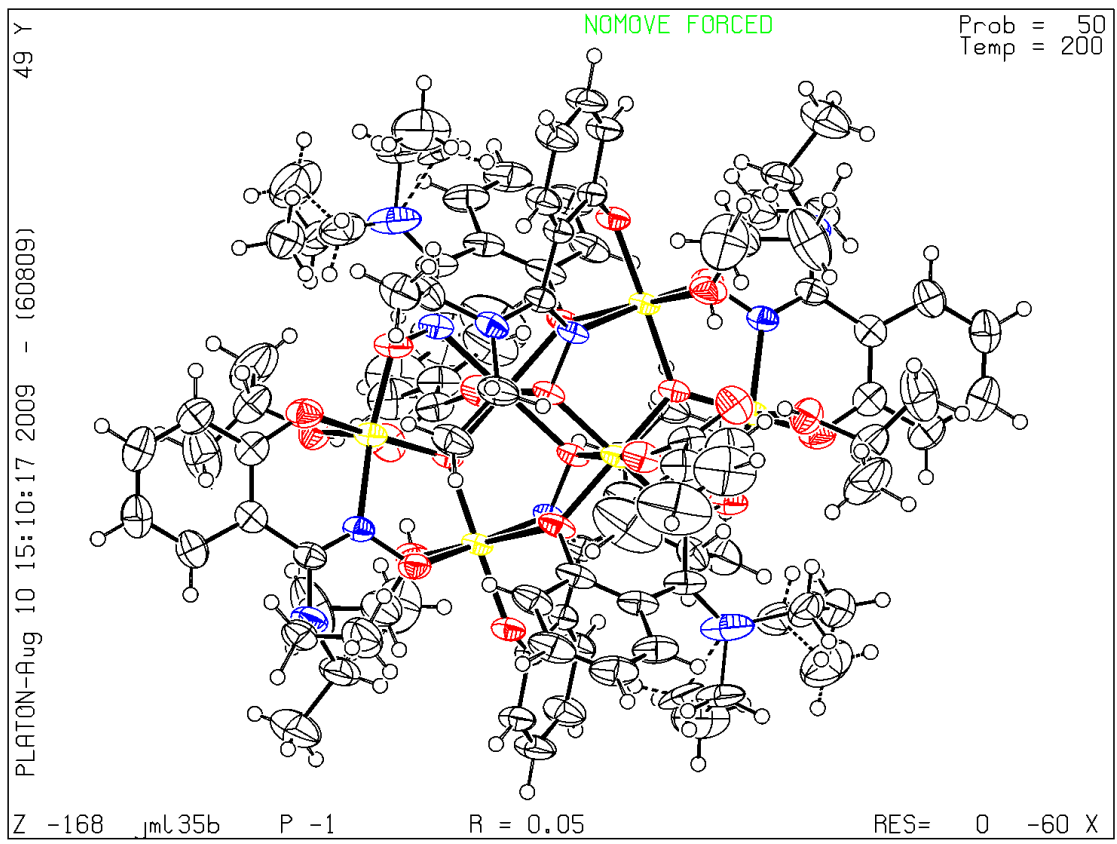

Supplement: mmc1 [file mmc1.pdf]
